# Supplementary material for: Topologically correct synthetic reconstruction of pathogen social behavior found during Yersinia growth in deep tissue sites
Source: eLife. 2020 Jun 16;9:e58106. doi: 10.7554/eLife.58106 (PMC7316508; doi:10.7554/eLife.58106)
Supplement: Supplementary file 1. [file elife-58106-supp1.xlsx]

## Sheet: Fig. 6
Statistical Test: Mann-Whitney
Periphery vs. PLI Ratio
Genotype	Condition#1	Condition#2	p value
WT	0mM	1mM	<0.0001
WT	0mM	2.5mM	<0.0001
Δhmp	0mM	1mM	<0.0001
Δhmp	0mM	2.5mM	<0.0001
Microcolony Area
Genotype	Condition#1	Condition#2	p value
WT	0mM	1mM	0.3658
WT	0mM	2.5mM	0.2808
Δhmp	0mM	1mM	<0.0001
Δhmp	0mM	2.5mM	<0.0001

## Sheet: Fig. 8
Statistical Test: Mann-Whitney
Periphery vs. PLI Ratio
Genotype	Condition#1	Condition#2	p value
WT	BMDM	LPS/IFNγ	<0.0001
WT	BMDM	L-NMMA+ LPS/IFNγ	0.6097
Δhmp	BMDM	LPS/IFNγ	<0.0001
Δhmp	BMDM	L-NMMA+ LPS/IFNγ	0.0391
Microcolony Area
Genotype	Condition#1	Condition#2	p value
WT	BMDM	LPS/IFNγ	0.0049
WT	BMDM	L-NMMA+ LPS/IFNγ	0.0194
Δhmp	BMDM	LPS/IFNγ	<0.0001
Δhmp	BMDM	L-NMMA+ LPS/IFNγ	0.6861
